# Supplementary material for: Automatic solid-phase extraction by programmable flow injection coupled to chromatographic fluorimetric determination of fluoroquinolones
Source: Royal Society of Chemistry journal article supplement (doi:10.1039/c8ay00327k), 2018-01-01
Supplement: c8ay00327k1.pdf [file c8ay00327k1.pdf]

## **Electronic Supplementary Information**

### **Analytical Methods**

#### **Automatic solid-phase extraction by programmable flow injection coupled to chromatographic fluorimetric determination of fluoroquinolones**

Patricia S. Peixoto<sup>a</sup>, Eduarda M. P. Silva<sup>a</sup>, Marcelo V. Osório<sup>a</sup>, Luisa Barreiros<sup>a,b</sup>, José L.F.C. Lima<sup>a</sup>, Marcela A. Segundo<sup>a,\*</sup>

<sup>a</sup> LAQV, REQUIMTE, Department of Chemistry, Faculty of Pharmacy, University of Porto, R Jorge Viterbo Ferreira, 228, 4050-313 Porto, Portugal.

<sup>b</sup> NIIF, CISA, School of Allied Health Sciences, Polytechnic Institute of Porto, R Dr. António Bernardino de Almeida, 400 4200-072, Porto, Portugal

\* Corresponding author.

Tel.: +351 220428676; Fax: +351 226093483

E-mail address: msegundo@ff.up.pt (M.A. Segundo)

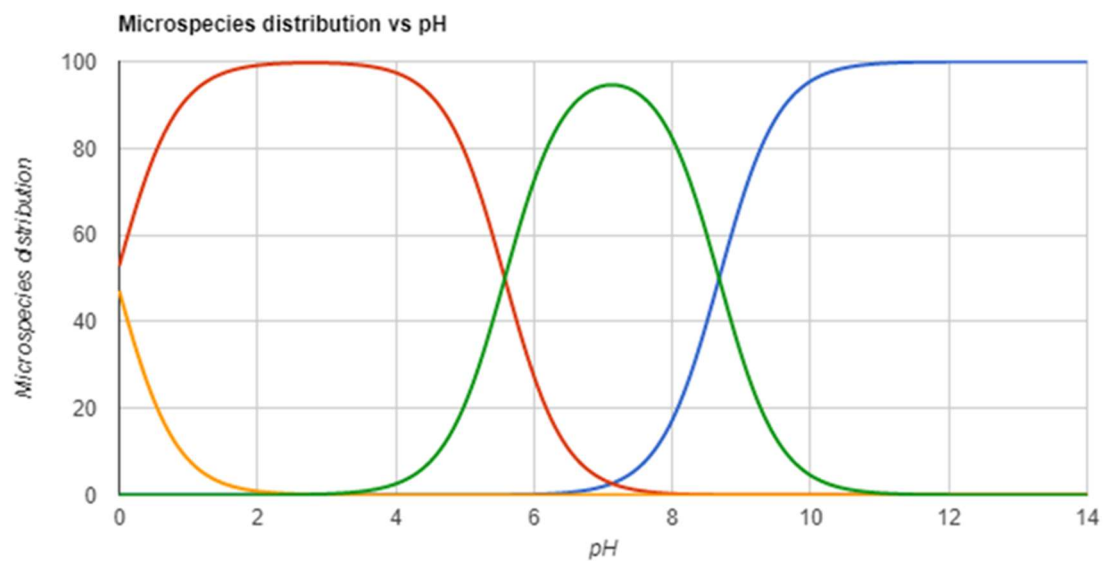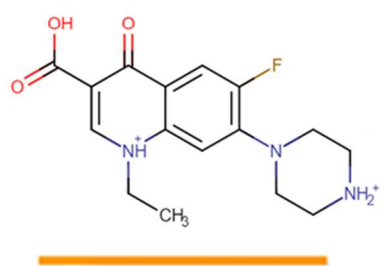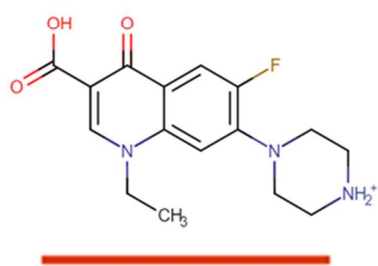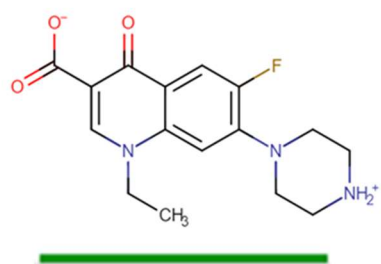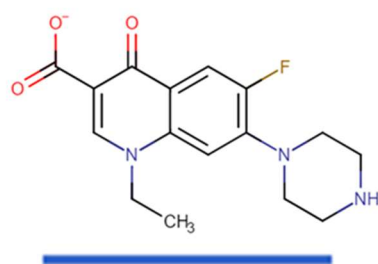

**Figure S1.** Norfloxacin structure featuring group ionization at different pH values. Calculations were performed using Chemicalize software (<https://chemicalize.com/>).

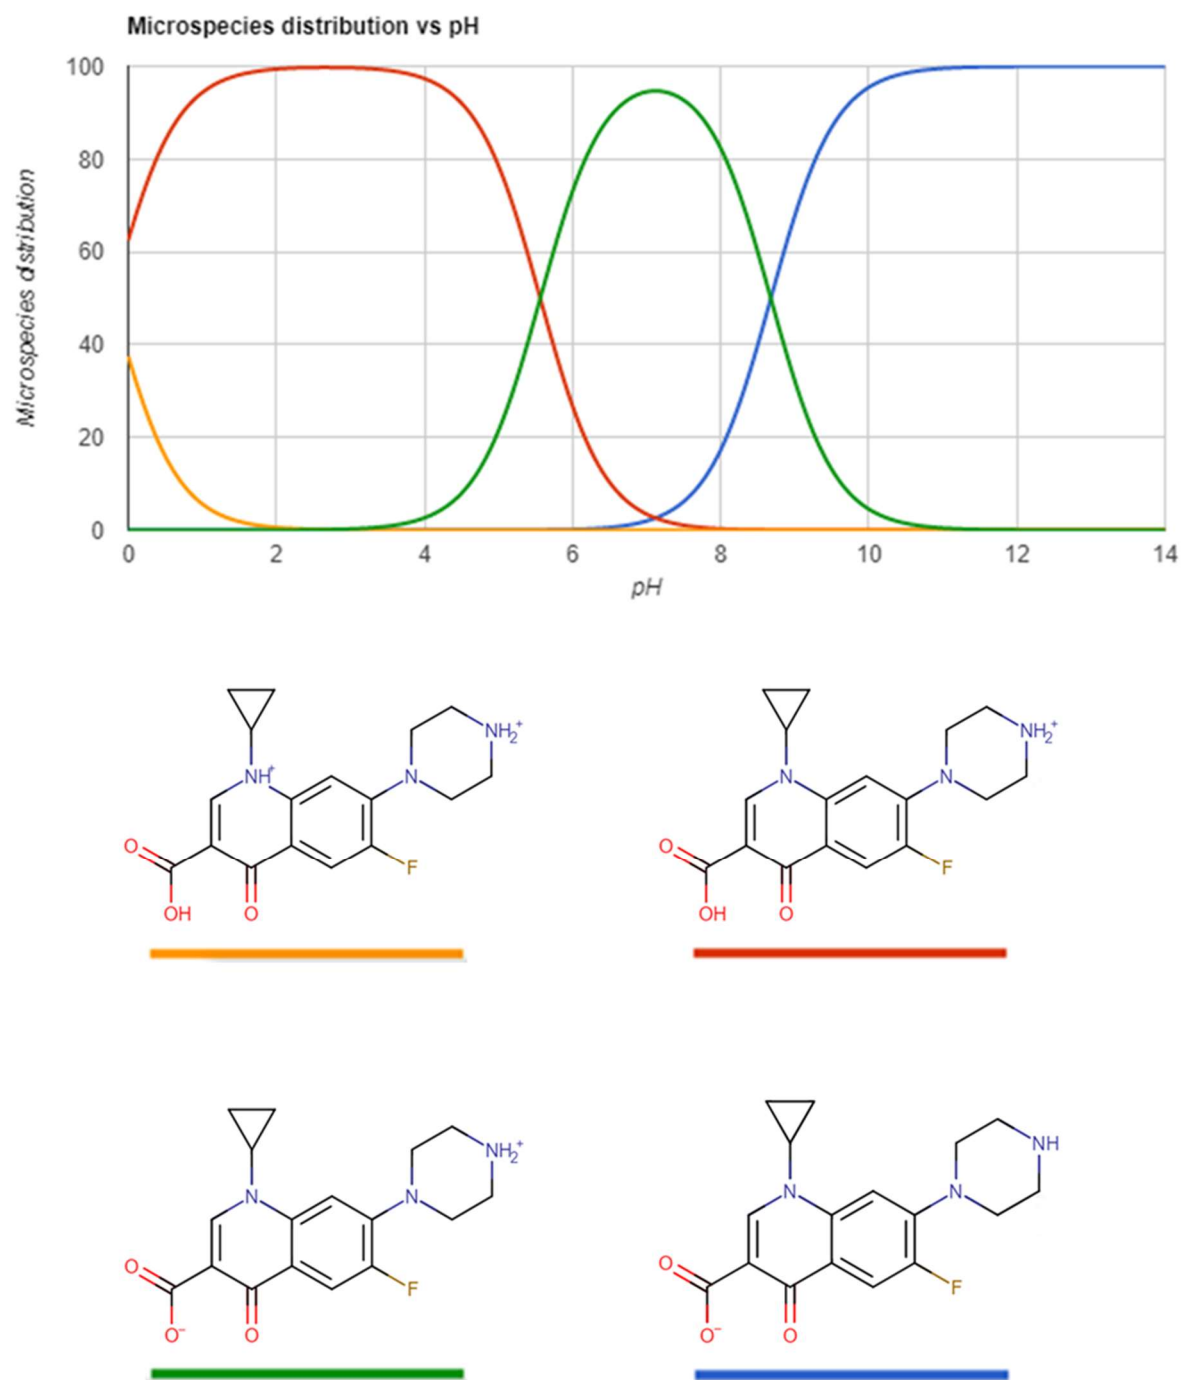

**Figure S2.** Ciprofloxacin structure featuring group ionization at different pH values. Calculations were performed using Chemicalize software (<https://chemicalize.com/>).

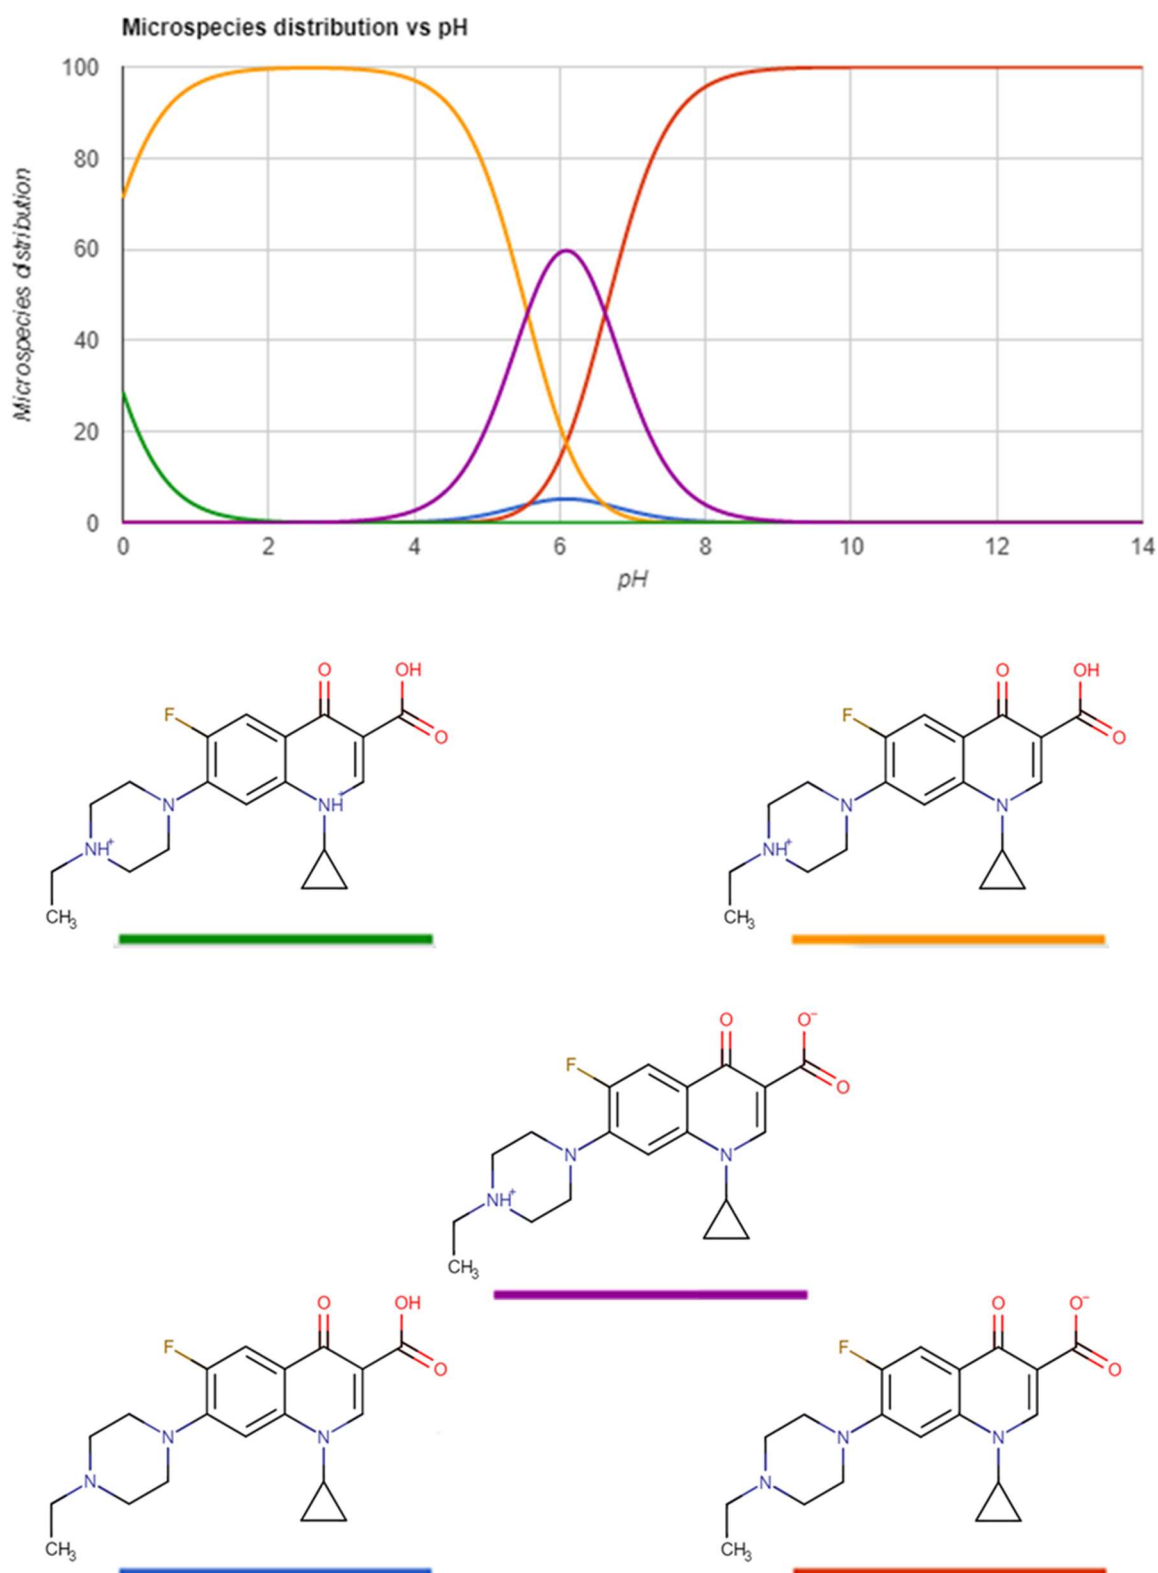

**Figure S3.** Enrofloxacin structure featuring group ionization at different pH values. Calculations were performed using Chemicalize software (<https://chemicalize.com/>).

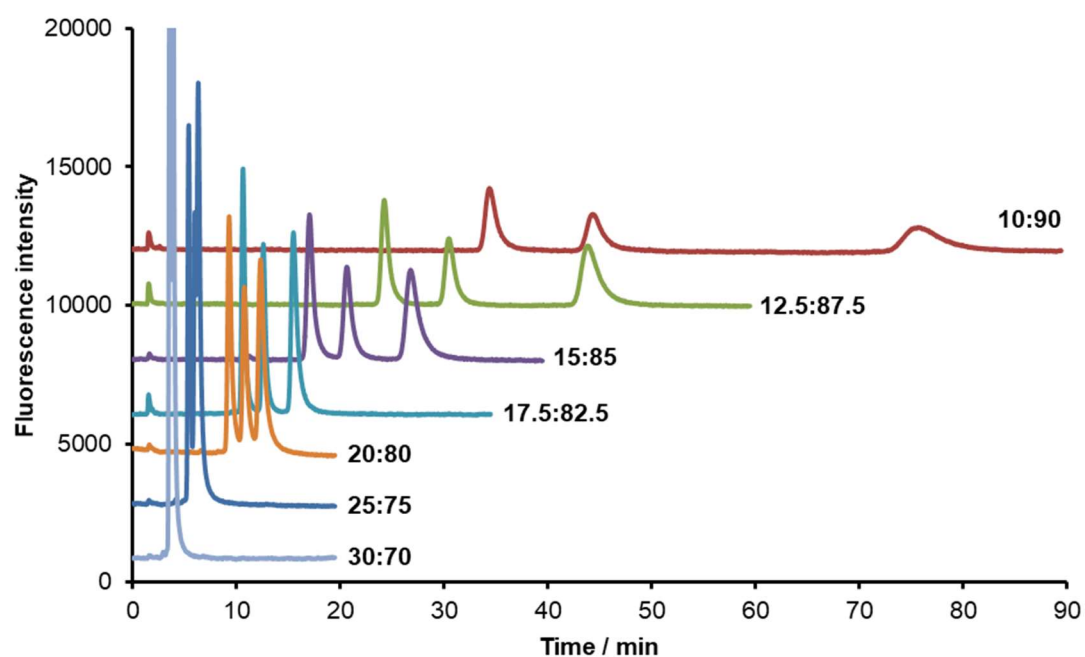

**Figure S4.** Effect of mobile phase composition on elution of norfloxacin (first peak), ciprofloxacin (second peak) and enrofloxacin (third peak) using different amounts of methanol-phosphoric acid (pH 3.0; 5.0 mM). Flow rate was kept at  $1.0 \text{ mL min}^{-1}$ , injection of  $20 \text{ }\mu\text{L}$  of  $10 \text{ mg L}^{-1}$  solution (in each fluoroquinolone).

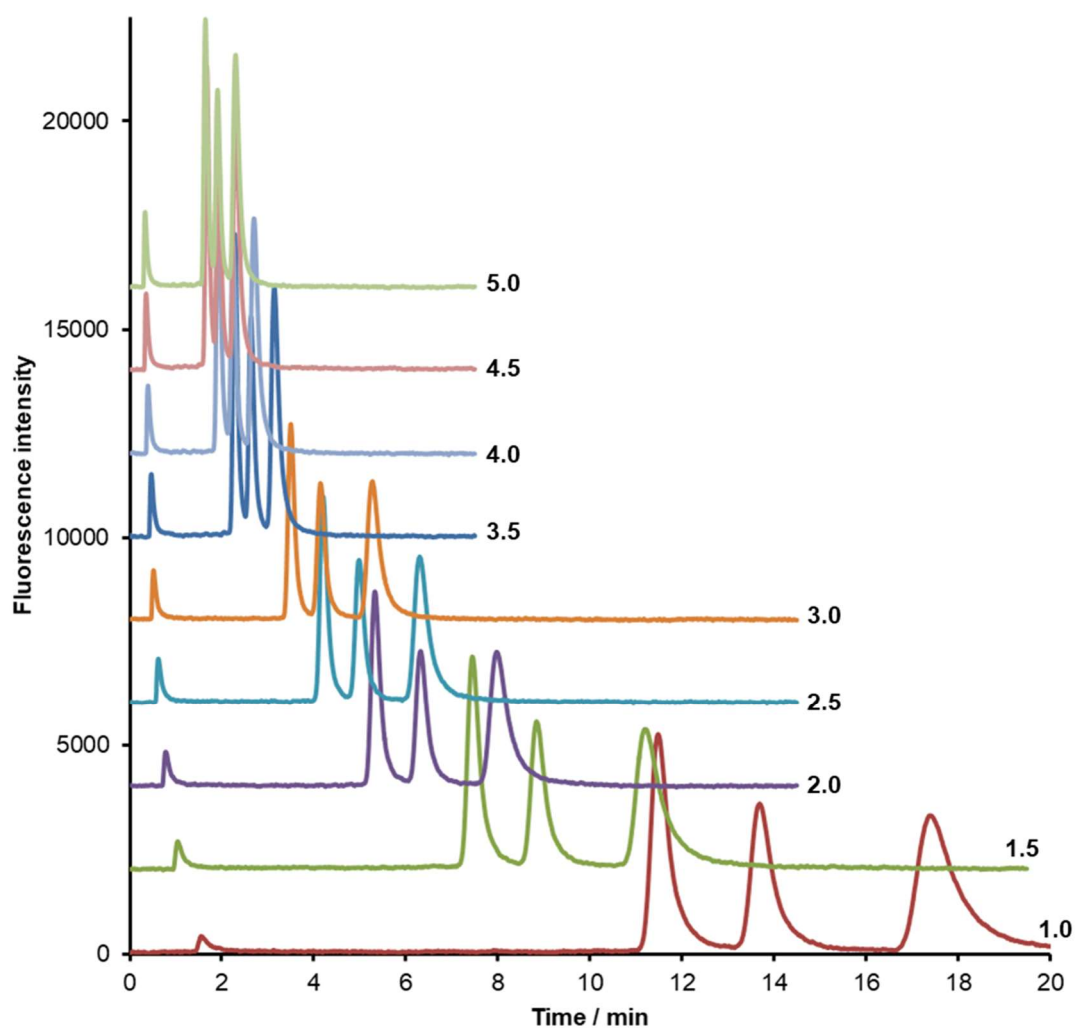

**Figure S5.** Effect of mobile phase flow rate on elution of norfloxacin (first peak), ciprofloxacin (second peak) and enrofloxacin (third peak). Mobile phase was methanol-phosphoric acid (pH 3.0; 5.0 mM) (17.5:82.5, v/v), for injection of 20  $\mu\text{L}$  of 10  $\text{mg L}^{-1}$  solution (in each fluoroquinolone).

**Table S1.** LOD and LOQ values for chromatographic and MSFIA-SPE procedures

|               | HPLC method <sup>a</sup> / $\mu\text{g L}^{-1}$ |      | MSFIA-SPE-HPLC method <sup>b</sup> / $\text{ng L}^{-1}$ |     |
|---------------|-------------------------------------------------|------|---------------------------------------------------------|-----|
|               | LOD                                             | LOQ  | LOD                                                     | LOQ |
| Norfloxacin   | 0.03                                            | 0.09 | 13                                                      | 35  |
| Ciprofloxacin | 0.06                                            | 0.2  | 19                                                      | 51  |
| Enrofloxacin  | 0.04                                            | 0.1  | 6                                                       | 17  |

<sup>a</sup> values for injection volume of 100  $\mu\text{L}$

<sup>b</sup> values for loading sample volume of 100 mL
